# Supplementary material
Source: Springer Nature journal article supplement (https://www.springermedizin.de/resource/supplementary/13075_2012_3656_MOESM1_ESM.pdf/9695066)

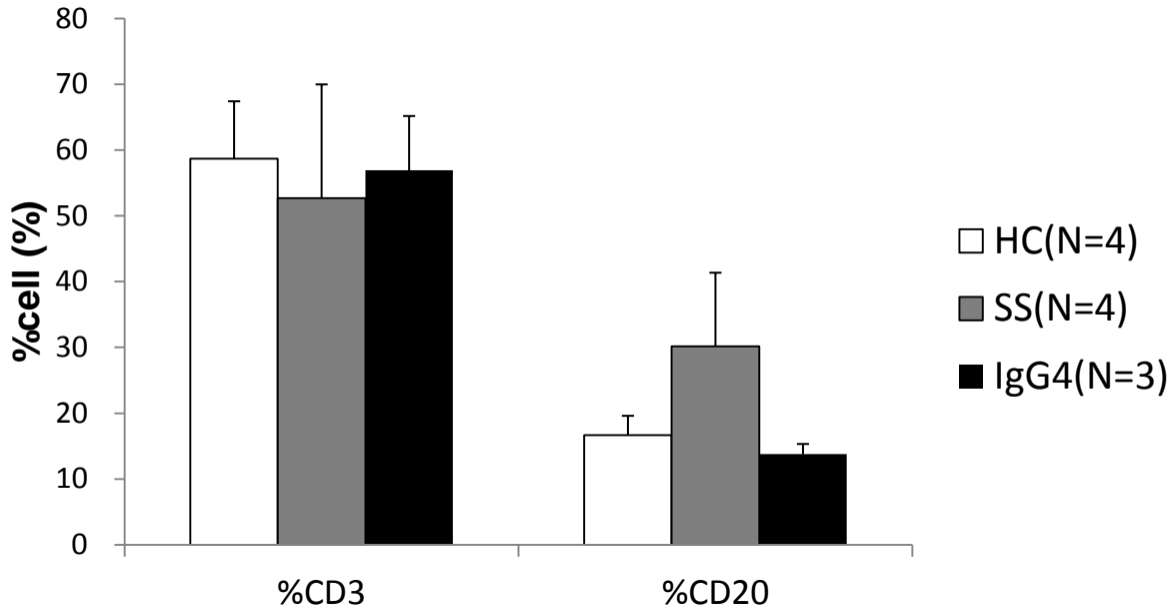

Supplement: MOESM1 [file 9695066]
